# Supplementary material for: Quality assessment of Sea Surface Salinity from multiple Ocean Reanalysis Products
Source: Preprints.org preprint supplement (doi:10.20944/preprints202212.0316.v1), 2022-12-19
Supplement: Supplementary file 1 [file supplementary]

Quality assessment of Sea Surface Salinity from multiple Ocean Reanalysis Products

Haodi Wang 1, You Ziqi 1, Guo Hailong 1, Wen Zhang 1,*, Xu Peng 2, Kaijun Ren 1,*

**Contents of this file**

Figures S1

**Introduction**

This file contains the comparison of RMSD values between five SSS reanalysis products with respect to the salinity data measured by GTMBA buoys at 1m depth at weekly scale.

**Figure S1.** Comparison of RMSD values between five SSS reanalysis products with respect to the salinity data measured by GTMBA buoys at 1m depth at weekly scale. The time range is from January 1, 2015 to December 31, 2015..
